# Supplementary material for: GADD45β Regulates Hepatic Gluconeogenesis via Modulating the Protein Stability of FoxO1
Source: MDPI journal article supplement (doi:10.3390/biomedicines9010050), 2021-01-08
Supplement: s1 [file s1]

## Supplementary Materials for

### GADD45 $\beta$ regulates hepatic gluconeogenesis via modulating the protein stability of FoxO1

Hyunmi Kim<sup>1,2</sup>, Da Som Lee<sup>1,2</sup>, Tae Hyeon An<sup>1,2</sup>, Tae-Jun Park<sup>1</sup>, Eun-Woo Lee<sup>1</sup>, Baek Soo Han<sup>1,2</sup>, Won Kon Kim<sup>1,2</sup>, Chul-Ho Lee<sup>3</sup>, Sang Chul Lee<sup>1,2</sup>, Kyoung-Jin Oh<sup>1,2,\*</sup> and Kwang-Hee Bae<sup>1,2,\*</sup>

- <sup>1</sup> Metabolic Regulation Research Center, Korea Research Institute of Bioscience and Biotechnology (KRIBB), Daejeon 34141, Republic of Korea; khm7607@kribb.re.kr (H.K.); dasom89@kribb.re.kr (D.S.L.); anth0291@kribb.re.kr (T.H.A.); tjpark@kribb.re.kr (T.-J.P.); ewlee@kribb.re.kr (E.-W.L.); bshan@kribb.re.kr (B.S.H.); wkkim@kribb.re.kr (W.K.K.); lesach@kribb.re.kr (S.C.L.); kjoh80@kribb.re.kr (K.-J.O.); khbae@kribb.re.kr (K.-H.B.)
  - <sup>2</sup> Department of Functional Genomics, KRIBB School of Bioscience, Korea University of Science and Technology (UST), Daejeon 34141, Republic of Korea.
  - <sup>3</sup> Laboratory Animal Resource Center, Korea Research Institute of Bioscience and Biotechnology (KRIBB), Daejeon 34141, Republic of Korea; chullee@kribb.re.kr (C.-H.L.)
- \* Correspondence: kjoh80@kribb.re.kr (K.-J.O.); khbae@kribb.re.kr (K.-H.B.)

#### Supplementary Materials

**Figure S1.** Levels of blood glucose and expression of the hepatic glucose and lipid metabolism-related genes in livers of GADD45 $\beta$  knockout (KO) mice under fasting and HFD conditions.

**Figure S2.** The effect of hepatic GADD45 $\beta$  knockdown (KD) on hepatic TG levels and the basal and AICAR-induced AMPK phosphorylation.

**Figure S3.** The effects of GADD45 $\beta$  on the insulin-mediated phosphorylation of AKT.

**Figure S4.** The effects of GADD45 $\beta$  on the protein stability and transcriptional activity of FoxO1.

**Figure S5.** The effects of GADD45 $\beta$  KO on insulin-mediated suppression of hepatic gluconeogenic genes.

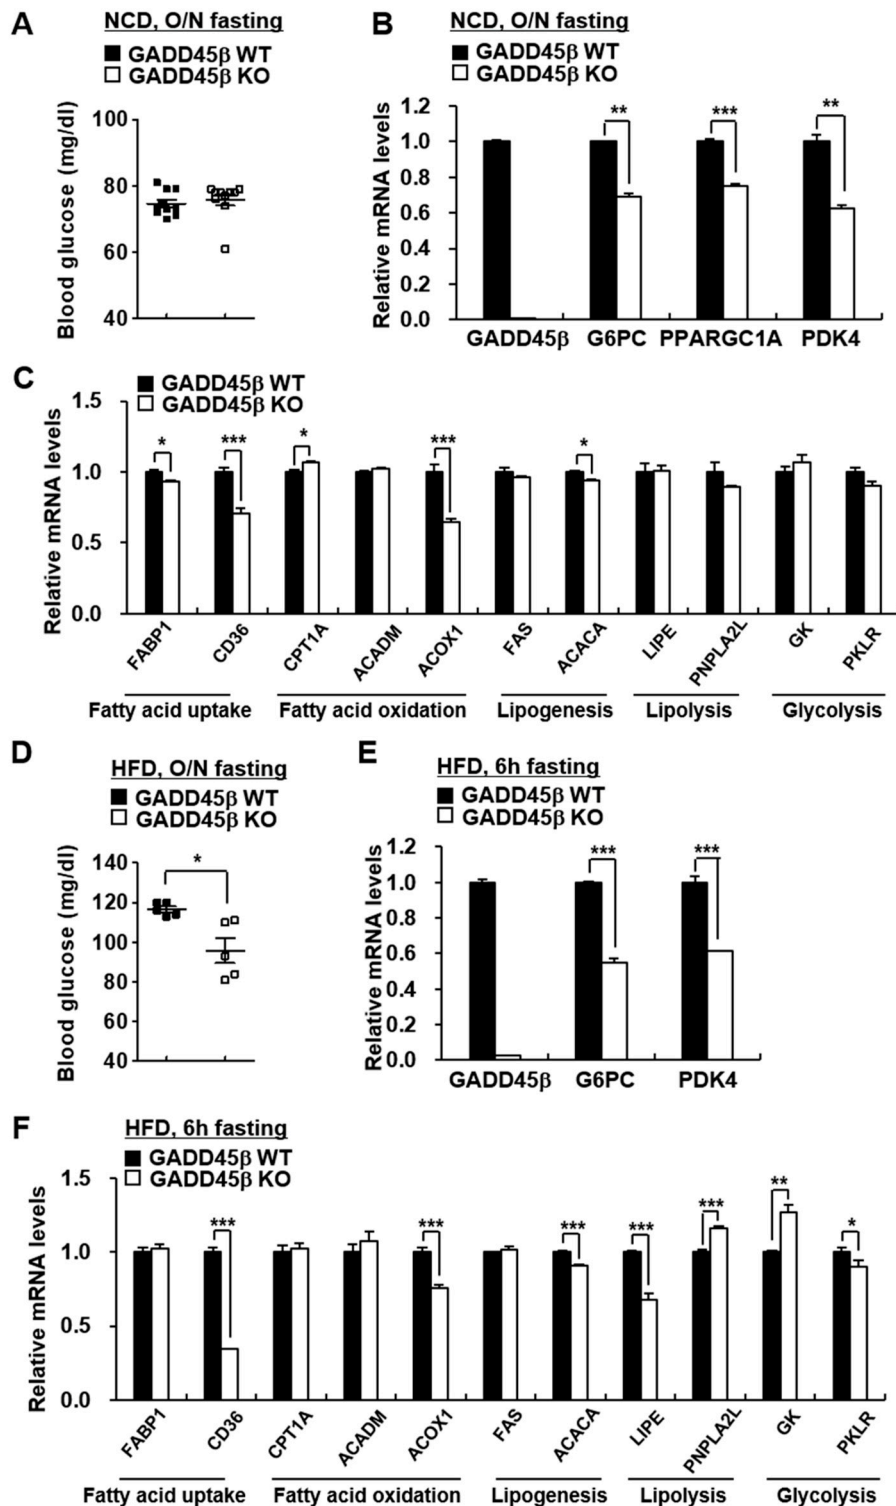

**Figure S1.** Levels of blood glucose and expression of the hepatic glucose and lipid metabolism-related genes in livers of GADD45 $\beta$  knockout (KO) mice under fasting and HFD conditions.

(A–C) 8-week-old male GADD45 $\beta$  WT or GADD45 $\beta$  KO mice were fasted for 16 h ( $n = 10$ /group). (A) Fasting (16 h) blood glucose levels. (B,C) qPCR analysis showing the effects of GADD45 $\beta$  KO on expression of the hepatic glucose and lipid-related genes in livers. (D–F) 8-week-old male GADD45 $\beta$  WT or GADD45 $\beta$  KO mice were fed a HFD for 12 weeks ( $n = 5$ /group). (D) Fasting (16 h) blood glucose levels. (E,F) qPCR analysis showing the effects of GADD45 $\beta$  KO on expression of the hepatic glucose and lipid-related genes in livers. Data in (B,C,E,F) represent the mean  $\pm$  SD, and data in (A,D) represent the mean  $\pm$  SEM (\* $p < 0.05$ ; \*\* $p < 0.005$ ; \*\*\* $p < 0.0005$ ; t-test).

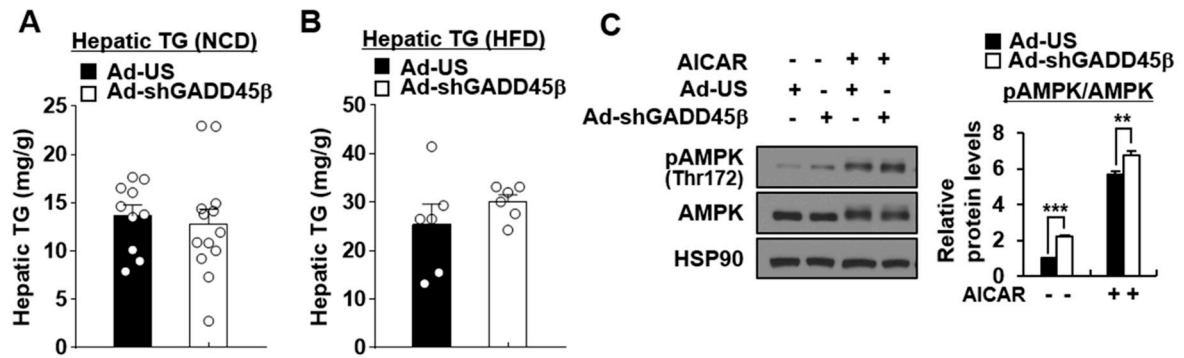

**Figure S2.** The effect of hepatic GADD45 $\beta$  knockdown (KD) on hepatic TG levels and the basal and AICAR-induced AMPK phosphorylation.

(A) 8-week-old C57BL/6 male mice were infected with Ad-shGADD45 $\beta$  ( $n = 15$ ) or Ad-US control ( $n = 10$ ) for 7 days. Hepatic triglyceride (TG) levels under 16-h fast conditions. (B) 8-week-old C57BL/6 male mice fed a HFD for 12 weeks were infected with Ad-shGADD45 $\beta$  ( $n = 6$ ) or Ad-US control ( $n = 6$ ) for 7 days. Hepatic triglyceride (TG) levels under 16 h fast conditions. (C) Mouse primary hepatocytes infected with Ad-US or Ad-shGADD45 $\beta$  were treated with 1 mM AICAR for 2 h. Western blot showing the effects of GADD45 $\beta$  KD on the phosphorylation level of AMPK. Data in (C) represent the mean  $\pm$  SD ( $*p < 0.05$ ; t-test).

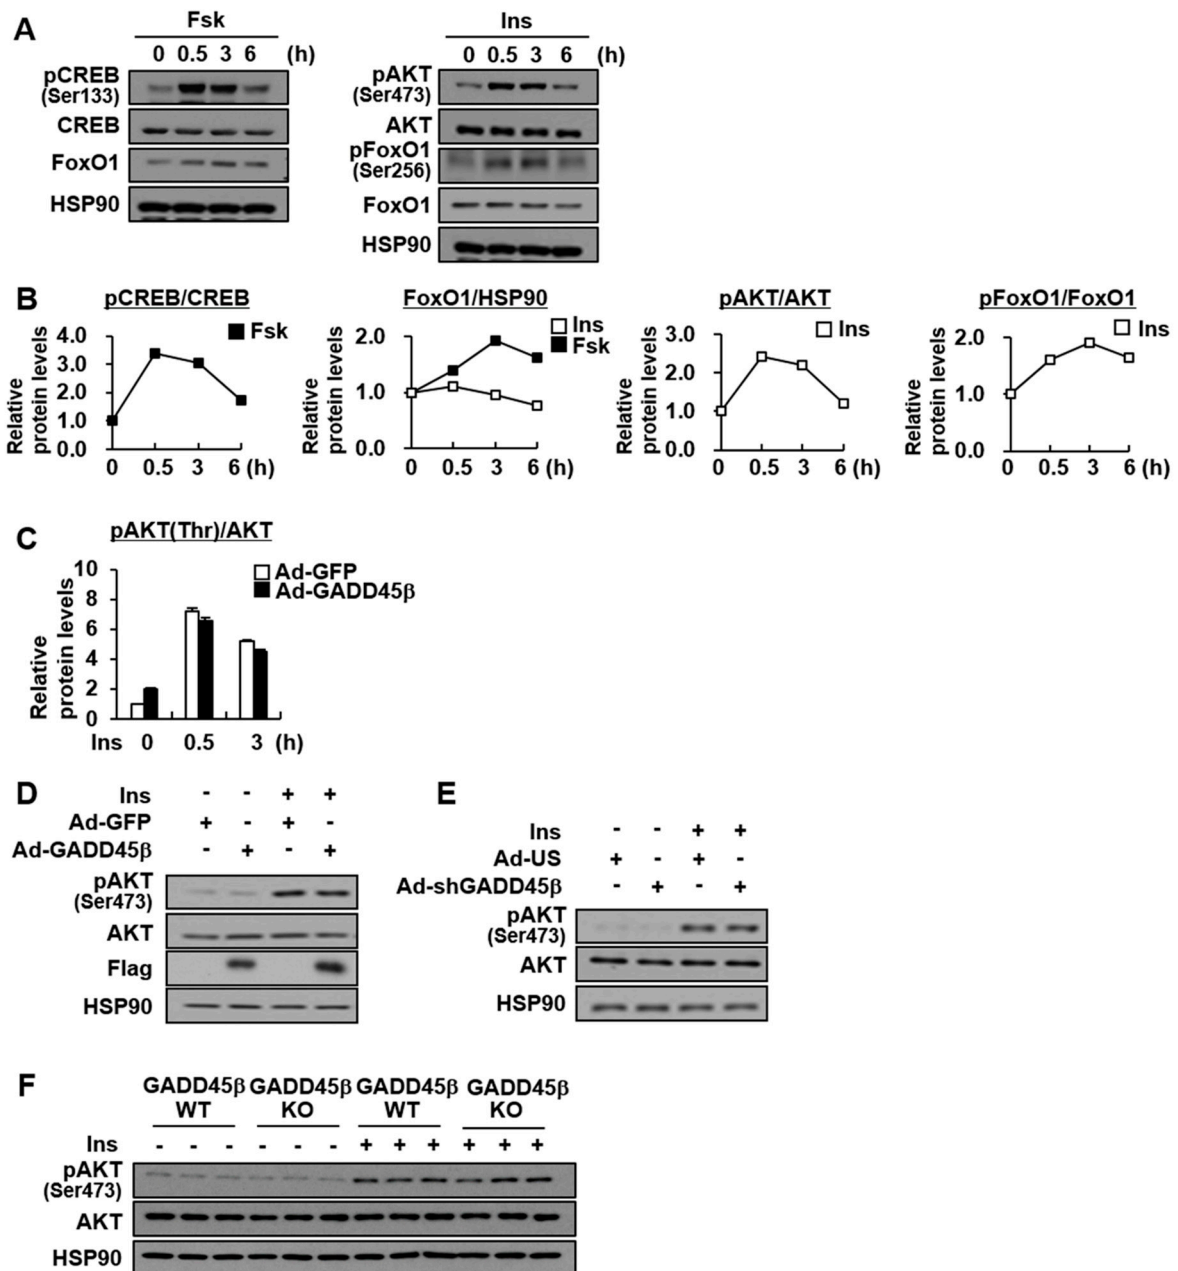

**Figure S3.** The effects of GADD45 $\beta$  on the insulin-mediated phosphorylation of AKT.

(A,B) Western blot (A) and quantified graph (B) showing the effects of Forskolin (Fsk) and insulin (Ins) on phosphor- and total protein levels of CREB, FoxO1, and AKT. Mouse primary hepatocytes were treated with 10uM Fsk or 100 nM Ins for 0, 0.5, 3, or 6 h. (C) Cell were treated with 100 nM insulin for 0.5 or 3 h. Bar graph showing the ratio of pAKT (Thr308) to AKT. (D-F) Western blot showing the effects of GADD45 $\beta$  overexpression (D), KD (E), and KO (F) on phosphor- and total levels of AKT. Mouse primary hepatocytes were infected with Ad-GFP or Ad-GADD45 $\beta$  (D) or with Ad-US or Ad-shGADD45 $\beta$  (E). Cells were treated with 100 nM Ins for 10 min.

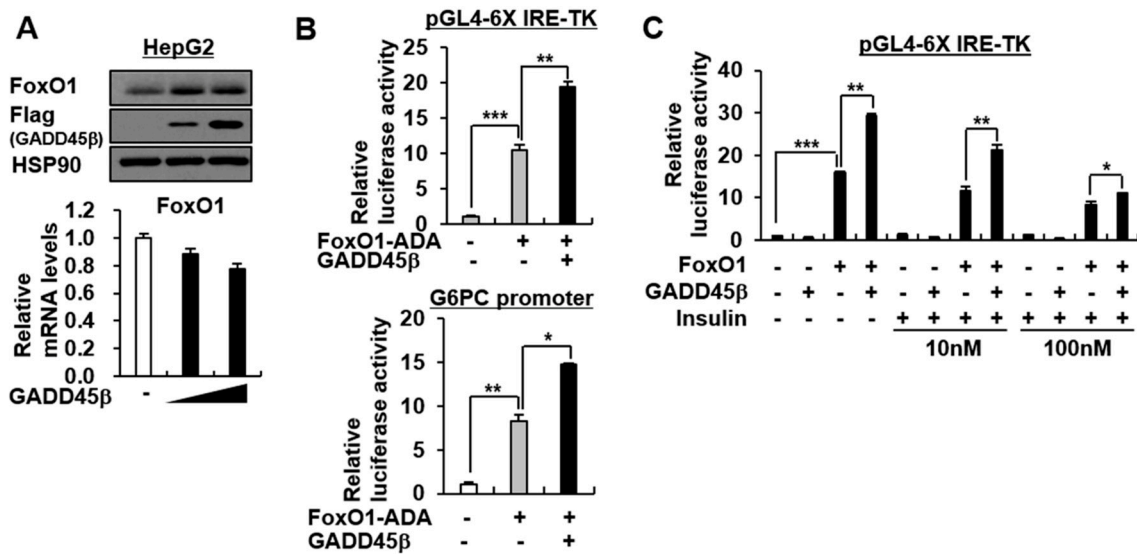

**Figure S4.** The effects of GADD45 $\beta$  on the protein stability and transcriptional activity of FoxO1.

(A) Western blot (upper) and qPCR analysis (bottom) showing the effects of GADD45 $\beta$  on FoxO1 protein and mRNA level. HepG2 cells were transfected with Flag- GADD45 $\beta$ . (B) Luciferase assay showing effects of GADD45 $\beta$  on FoxO1-induced promoter activities of 6X insulin response element (IRE) and G6PC. HepG2 cells were co-transfected with pGL4-6X-IRE-TK (upper) or pGL4-G6PC (bottom) promoters and HA-FoxO1 ADA with or without Flag- GADD45 $\beta$ . (C) Luciferase assay showing effects of GADD45 $\beta$  on insulin-suppressive effects of 6X insulin response element (IRE) promoter. HepG2 cells were co-transfected with pGL4-6X-IRE-TK (upper) promoters and HA-FoxO1 ADA with or without Flag- GADD45 $\beta$ , and treated with 10 nM or 100nM insulin for 10 min. Luciferase activity was measured 48 h after transfection and normalized to RSV  $\beta$ -gal levels. Data in (B,C) represent the mean  $\pm$  SD (\* $p$  < 0.05; \*\* $p$  < 0.005; \*\*\* $p$  < 0.0005; t-test).

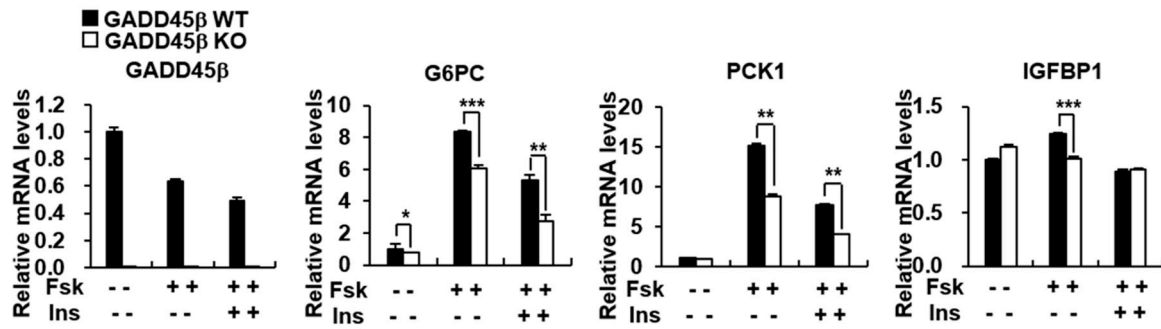

**Figure S5.** The effects of GADD45 $\beta$  KO on insulin-mediated suppression of hepatic gluconeogenic genes.

qPCR analysis showing the effects of GADD45 $\beta$  KO on GADD45 $\beta$ , G6PC, PCK1, and IGFBP1 mRNA levels. Mouse primary hepatocytes were treated with or without 10  $\mu$ M Fsk for 2 h in the absence or presence of 100 nM Ins for 24 h. Data represent the mean  $\pm$  SD (\* $p$  < 0.05; \*\* $p$  < 0.005; \*\*\* $p$  < 0.0005; t-test).
